# Supplementary material
Source: PubMed Central journal article supplement (PMC6588101)
Supplement: Supp_Fig1.pdf [file Supp_Fig1.pdf]

## Supplementary Data

| Western Consortium for Cancer Nursing Research (WCCNR) Scale<br>to Assess Nasopharyngeal Mucosal Damage |                                                                      |                                                                                                  |                                                                                                      |
|---------------------------------------------------------------------------------------------------------|----------------------------------------------------------------------|--------------------------------------------------------------------------------------------------|------------------------------------------------------------------------------------------------------|
| Grade 0                                                                                                 | Grade 1                                                              | Grade 2                                                                                          | Grade 3                                                                                              |
| No changes                                                                                              | Slight erythema, moist mucosa, no bleeding or infection, mild edema. | Moderate erythema, ulceration, bleeding of mucosa with probing, mild xerostomia, moderate edema. | Severe erythema, more than 1 confluent ulcer, spontaneous bleeding, marked xerostomia, severe edema. |

  

|                             |                                                                                                                                                                                                                                                                                                                                                          |                                                                                                                                                                                                                                                                                                                                                               |  |
|-----------------------------|----------------------------------------------------------------------------------------------------------------------------------------------------------------------------------------------------------------------------------------------------------------------------------------------------------------------------------------------------------|---------------------------------------------------------------------------------------------------------------------------------------------------------------------------------------------------------------------------------------------------------------------------------------------------------------------------------------------------------------|--|
|                             | <div style="display: flex; justify-content: space-around;"> <div style="text-align: center;"> <p><b>L</b></p> 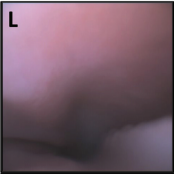 </div> <div style="text-align: center;"> <p><b>R</b></p>  </div> </div> |                                                                                                                                                                                                                                                                                                                                                               |  |
| Septum (anterior)           |                                                                                                                                                                                                                                                                                                                                                          | Dorsal Turbinate (posterior)                                                                                                                                                                                                                                                                                                                                  |  |
|                             | <div style="display: flex; justify-content: space-around;">   </div>                                                                                                                   | <div style="display: flex; justify-content: space-around;"> <div style="text-align: center;"> <p><b>L</b></p>  </div> <div style="text-align: center;"> <p><b>R</b></p>  </div> </div>   |  |
| Septum (posterior)          |                                                                                                                                                                                                                                                                                                                                                          | Ventral Turbinate                                                                                                                                                                                                                                                                                                                                             |  |
|                             | <div style="display: flex; justify-content: space-around;">   </div>                                                                                                                 | <div style="display: flex; justify-content: space-around;"> <div style="text-align: center;"> <p><b>L</b></p>  </div> <div style="text-align: center;"> <p><b>R</b></p>  </div> </div>   |  |
| Dorsal Turbinate (anterior) |                                                                                                                                                                                                                                                                                                                                                          | Nasopharynx                                                                                                                                                                                                                                                                                                                                                   |  |
|                             |                                                                                                                                                                                                                                                                                                                                                          | <div style="display: flex; justify-content: space-around;"> <div style="text-align: center;"> <p><b>*</b></p>  </div> <div style="text-align: center;"> <p><b>R</b></p>  </div> </div> |  |

**SUPPLEMENTARY FIG. S1.** Endoscopic evaluation of nasal mucosa. A mild erythema was identified in one of group B subjects during safety study (\*Grade 1 in Western Consortium for Cancer Nursing Research [WCCNR]). No grade 2 or higher lesion was observed across the groups investigated (B and C).
